# Supplementary material for: Enhanced Photovoltaic Properties of Bulk Heterojunction Organic Photovoltaic Devices by an Addition of a Low Band Gap Conjugated Polymer
Source: Materials (Basel). 2016 Dec 8;9(12):996. doi: 10.3390/ma9120996 (PMC5456957; doi:10.3390/ma9120996)
Supplement: Supplementary file 1 [file materials-09-00996-s001.pdf]

# Supplementary Materials: Enhanced Photovoltaic Properties of Bulk Heterojunction Organic Photovoltaic Devices by an Addition of a Low Band Gap Conjugated Polymer

Eui Jin Lee, Min Hee Choi and Doo Kyung Moon

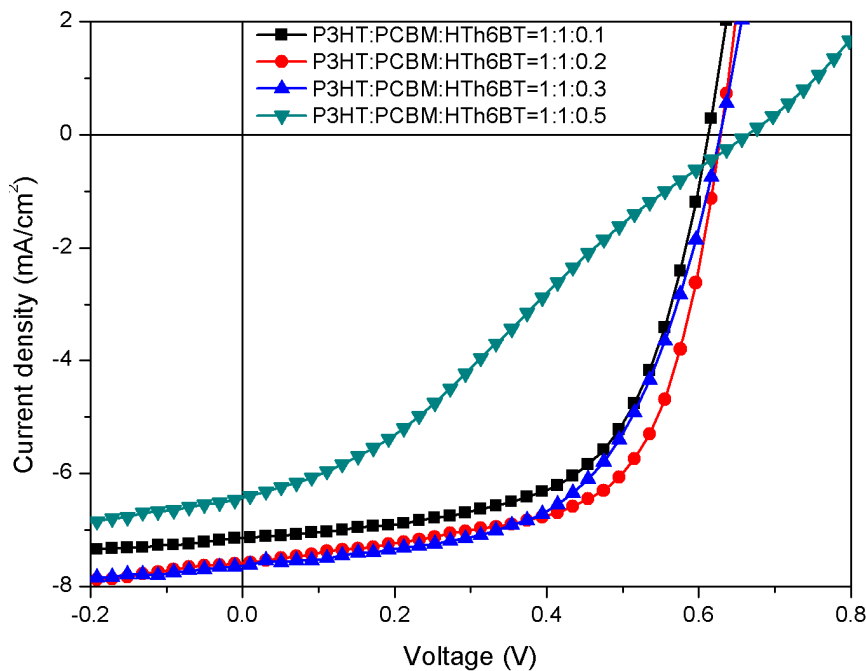

Figure S1.  $J$ - $V$  curves of OPV devices with different ratio of HTh6BT.

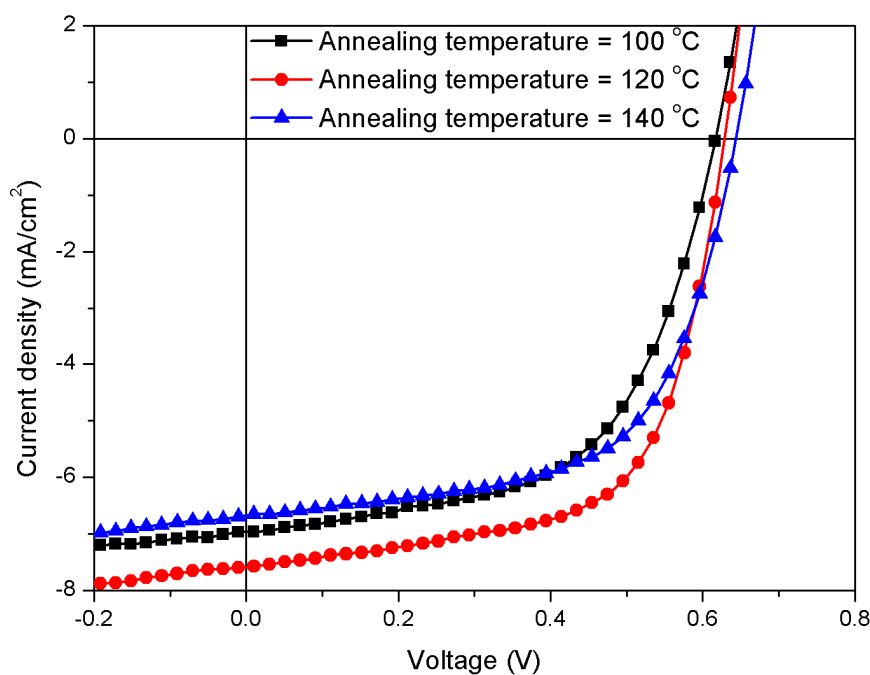

Figure S2.  $J$ - $V$  curves of OPV devices with optimal ratio and different annealing temperature.

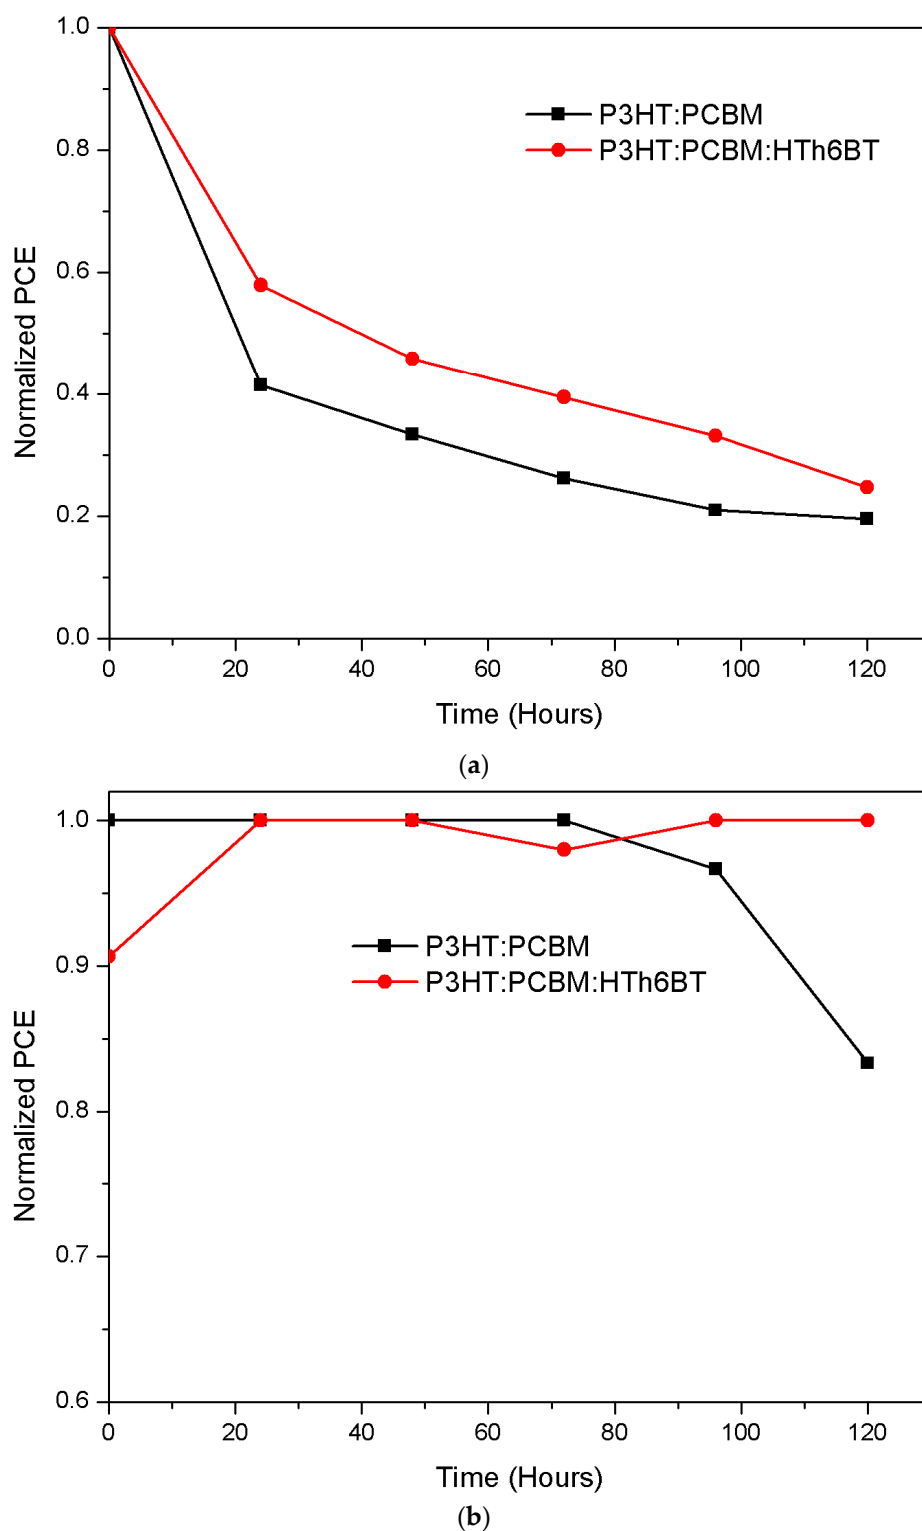

**Figure S3.** Variation of normalized PCE of devices, which were stored in air with constant temperature and humidity (23 °C, 50%) (a) ITO/PEDOT:PSS/Photoactive layer/Al and (b) ITO/ZnO/Photoactive layer/MoO<sub>3</sub>/Ag.

**Table S1.** Photovoltaic performances of OPV devices with different ratio of HTh6BT.

| <b>P3HT:PCBM:HTh6BT (w/w)</b> | <b><math>J_{sc}</math> (mA/cm<sup>2</sup>)</b> | <b><math>V_{oc}</math> (V)</b> | <b>FF (%)</b> | <b>PCE (%)</b> |
|-------------------------------|------------------------------------------------|--------------------------------|---------------|----------------|
| 1:1:0.1                       | 7.1                                            | 0.616                          | 60.4          | 2.7            |
| 1:1:0.2                       | 7.6                                            | 0.636                          | 62.3          | 3.0            |
| 1:1:0.3                       | 7.6                                            | 0.636                          | 57.2          | 2.8            |
| 1:1:0.5                       | 6.4                                            | 0.657                          | 29.5          | 1.2            |

**Table S2.** Photovoltaic performances of OPV devices with optimal ratio and different annealing temperature.

| <b>Annealing Temperature (°C)</b> | <b><math>J_{sc}</math> (mA/cm<sup>2</sup>)</b> | <b><math>V_{oc}</math> (V)</b> | <b>FF (%)</b> | <b>PCE (%)</b> |
|-----------------------------------|------------------------------------------------|--------------------------------|---------------|----------------|
| 100                               | 7.0                                            | 0.616                          | 57.5          | 2.5            |
| 120                               | 7.6                                            | 0.636                          | 62.3          | 3.0            |
| 140                               | 6.7                                            | 0.636                          | 61.8          | 2.6            |
